# Supplementary material for: The Dutch Bipolar Offspring Study: 12-Year Follow-Up
Source: Atypon-hosted journal article supplement (doi:10.1176/appi.ajp.2012.12030401), 2013-02-22
Supplement: 542_ds001.pdf [file 542_ds001.pdf]

**TABLE S1. Clinical Characteristics of Subjects With a Bipolar Spectrum Disorder**

| Bipolar parent      |                         |                                   | Offspring           |                         |                                 |                           |                                                |                                        |                                                  |                              |                                  |                               |
|---------------------|-------------------------|-----------------------------------|---------------------|-------------------------|---------------------------------|---------------------------|------------------------------------------------|----------------------------------------|--------------------------------------------------|------------------------------|----------------------------------|-------------------------------|
| Gender <sup>a</sup> | Type of BD <sup>b</sup> | Age at first (hypo) manic episode | Gender <sup>a</sup> | Type of BD <sup>b</sup> | Index mood episode <sup>c</sup> | Age at index mood episode | Age at first (hypo) manic episode <sup>d</sup> | Age of onset comorbid anxiety disorder | Lifetime comorbid substance abuse (age of onset) | Hospitalization <sup>e</sup> | Medication, current <sup>f</sup> | Medication, past <sup>f</sup> |
| F                   | BD I                    | 30                                | F                   | BD II                   | MDD                             | 13                        | 19                                             | -                                      | -                                                | -                            | -                                | -                             |
| F                   | BD I                    | 30                                | F                   | BD II                   | Dep NOS                         | 8                         | 16                                             | 16                                     | -                                                | -                            | -                                | Benzo                         |
| F                   | BD II                   | 17                                | M                   | BD II                   | Dysthymia                       | 10                        | 16                                             | 10                                     | -                                                | -                            | *                                | -                             |
| M                   | BD I                    | 42                                | F                   | BD II                   | MDD                             | 20                        | 21 <sup>AD</sup>                               | 25                                     | -                                                | -                            | AP                               | AE; Benzo                     |
| F                   | BD I                    | 32                                | F                   | BD II                   | Dep NOS                         | 19                        | 24 <sup>AD</sup>                               | 21                                     | -                                                | -                            | *                                | AD                            |
| F                   | BD I                    | 18                                | F                   | BD II                   | Dep NOS                         | 16                        | 25                                             | -                                      | -                                                | -                            | -                                | -                             |
| F                   | BD I                    | 18                                | M                   | BD I                    | MDD                             | 17                        | 17                                             | 22                                     | -                                                | MM                           | Li; AD                           | AP; Benzo                     |
| M                   | BD II                   | 40                                | M                   | CYCL                    | CYCL                            | 22                        | 22                                             | -                                      | -                                                | -                            | AD                               | -                             |
| M                   | BD I                    | 43                                | M                   | BD II                   | Dep NOS                         | 23                        | 31                                             | 25                                     | 19                                               | -                            | -                                | -                             |
| F                   | BD I                    | 17                                | M                   | BD I                    | MDD                             | 10                        | 18                                             | -                                      | 16                                               | M                            | -                                | Li                            |
| F                   | BD I                    | 46                                | M                   | BD I                    | MDD                             | 15                        | 15                                             | -                                      | -                                                | M                            | Li                               | -                             |
| F                   | BD I                    | 43                                | F                   | BD II                   | Dysthymia                       | 11                        | 16                                             | 11                                     | -                                                | -                            | -                                | -                             |
| F                   | BD I                    | 18                                | F                   | SCH-BD                  | Dep NOS                         | 12                        | 13                                             | -                                      | -                                                | MM                           | AP; Benzo                        | -                             |
| M                   | BD I                    | 32                                | M                   | BD II                   | CYCL                            | 12                        | 16                                             | 22                                     | -                                                | -                            | Li                               | -                             |
| M                   | BD I                    | 32                                | M                   | BD I                    | Depr NOS                        | 15                        | 16                                             | -                                      | -                                                | M                            | Li; AD                           | Val                           |
| M                   | BD II                   | 37                                | M                   | BD II                   | Dysthymia                       | 8                         | 20 <sup>AD-S</sup>                             | -                                      | -                                                | D                            | Stimulant                        | AD                            |
| F                   | BD I                    | 28                                | M                   | BD II                   | Dysthymia                       | 11                        | 25 <sup>AD</sup>                               | 2                                      | 18                                               | -                            | -                                | AD                            |

<sup>a</sup> F=female, M=male; <sup>b</sup> BD I= bipolar I disorder, BD II=bipolar II disorder, CYCL= cyclothymia, SCH-BD=schizoaffective disorder-bipolar type ; <sup>c</sup> CYCL= cyclothymia, MDD=Major depressive disorder; Dep NOS= Depression Not Otherwise Specified; <sup>d</sup> AD=use of antidepressants before onset of first hypomanic episode, S= Use of stimulants before onset of first (hypo)manic episode; <sup>e</sup> Episode first hospitalization: D=depression, M=mania, MM=mixed mania; <sup>f</sup> Li=lithium, AD=antidepressant, AP=antipsychotic, Val=valproate, AE=antiepileptic, Benzo=benzodiazepine, S=stimulant.

**TABLE S2. The Effect of Age at Intake at the Prevalence of Psychopathology**

| Psychopathology                 | Baseline <16 | Baseline > 16 | p <sup>a</sup> | 12 Years < 16 | 12 Years > 16 | p <sup>a</sup> |
|---------------------------------|--------------|---------------|----------------|---------------|---------------|----------------|
|                                 | n=67         | n=73          |                | n=54          | n=54          |                |
| Any mood disorder               | 22%          | 32%           | 0.257          | 50%           | 57%           | 0.563          |
| Major depressive disorder       | 4%           | 7%            | 0.721          | 19%           | 15%           | 0.797          |
| Dysthymic disorder              | 9%           | 4%            | 0.311          | 11%           | 6%            | 0.489          |
| Depressive disorder NOS         | 7%           | 12%           | 0.406          | 13%           | 28%           | 0.093          |
| Bipolar Spectrum disorders      | 1%           | 7%            | 0.211          | 11%           | 15%           | 0.776          |
| Bipolar disorder (BD I, BD II)  | 1%           | 4%            | 0.621          | 7%            | 15%           | 0.359          |
| Schizoaffective disorder        | 0%           | 0%            | 1.000          | 2%            | 0%            | 1.000          |
| Cyclothymia                     | 0%           | 3%            | 0.497          | 2%            | 0%            | 1.000          |
| Adjustment disorder - Mood      | 1%           | 0%            | 0.479          | 4%            | 4%            | 1.000          |
| Psychosis                       | 0%           | 0%            | 1.000          | 0%            | 0%            | 1.000          |
| Anxiety disorders               | 7%           | 14%           | 0.282          | 17%           | 33%           | 0.740          |
| Disruptive behavioral disorders | 1%           | 10%           | 0.065          | 7%            | 7%            | 1.000          |
| Attention deficit disorder      | 4%           | 5%            | 0.710          | 7%            | 2%            | 0.363          |
| Substance abuse disorder        | <b>0%</b>    | <b>12%</b>    | <b>0.003</b>   | 22%           | 22%           | 1.000          |
| Other disorders <sup>b</sup>    | 13%          | 18%           | 0.497          | 19%           | 28%           | 0.362          |
| Any disorder                    | <b>31%</b>   | <b>55%</b>    | <b>0.006</b>   | 67%           | 78%           | 0.283          |

<sup>a</sup> Pearson chi-square test was applied, or when expected frequencies were <5, we applied Fisher's exact test.

<sup>b</sup> Consists of enuresis, encopresis, pervasive developmental disorder, tic disorder, body dysmorphic disorder, and eating disorder.
